# Supplementary material for: A Multimodal Machine Learning Model Integrating Ultrasound and Serological Biomarkers for Non-Invasive Prediction of Gallbladder Polyp Malignancy: Development, Validation, and Clinical Translation
Source: Research Square preprint supplement (doi:10.21203/rs.3.rs-6744318/v1), 2025-06-25
Supplement: Supplementary file 1 [file 327ec6a77863469d6f682242.xlsx]

## Sheet: Sheet1
Supplymentary table 1 Information in training set
Variable	Overall	Polyp	Cancer	Statistic	P_Value
female	67 (47.2%)	51 (47.7%)	16 (45.7%)	0	1
male	75 (52.8%)	56 (52.3%)	19 (54.3%)
stalk(sessile)	85 (59.9%)	75 (70.1%)	10 (28.6%)	17.23	<0.01
stalk(pedunculated)	57 (40.1%)	32 (29.9%)	25 (71.4%)
Waist_Hip_Ratio(Normal)	67 (47.2%)	50 (46.7%)	17 (48.6%)	0	1
Waist_Hip_Ratio(fatty)	75 (52.8%)	57 (53.3%)	18 (51.4%)
Hypertension(no)	104 (73.2%)	79 (73.8%)	25 (71.4%)	0	0.95
Hypertension(yes)	38 (26.8%)	28 (26.2%)	10 (28.6%)
Diabetes(no)	124 (87.3%)	95 (88.8%)	29 (82.9%)	0.39	0.53
Diabetes(yes)	18 (12.7%)	12 (11.2%)	6 (17.1%)
Hyperlipidemia(no)	115 (81%)	87 (81.3%)	28 (80%)	0	1
Hyperlipidemia(yes)	27 (19%)	20 (18.7%)	7 (20%)
Alcohol history(no)	134 (94.4%)	104 (97.2%)	30 (85.7%)	4.56	0.03
Alcohol history(yes)	8 (5.6%)	3 (2.8%)	5 (14.3%)
Polyp_Location(bottom)	54 (38%)	34 (31.8%)	20 (57.1%)	8.46	0.01
Polyp_Location(body)	54 (38%)	47 (43.9%)	7 (20%)
Polyp_Location(neck)	34 (23.9%)	26 (24.3%)	8 (22.9%)
Polyp_Number(single)	68 (47.9%)	51 (47.7%)	17 (48.6%)	0	1
Polyp_Number(multiple)	74 (52.1%)	56 (52.3%)	18 (51.4%)
Echo_Homogeneity	52 (36.6%)	43 (40.2%)	9 (25.7%)	1.8	0.18
Echo_Heterogeneous	90 (63.4%)	64 (59.8%)	26 (74.3%)
Polyp Surface Smoothness	122 (85.9%)	92 (86%)	30 (85.7%)	0	1
Polyp Surface Coarse	20 (14.1%)	15 (14%)	5 (14.3%)
Hyperechoic_Foci(no)	77 (54.2%)	52 (48.6%)	25 (71.4%)	4.66	0.03
Hyperechoic_Foci(yes)	65 (45.8%)	55 (51.4%)	10 (28.6%)
Gallstones(no)	43 (30.3%)	30 (28%)	13 (37.1%)	0.65	0.42
Gallstones(yes)	99 (69.7%)	77 (72%)	22 (62.9%)
Gallbladder_Smooth	108 (76.1%)	81 (75.7%)	27 (77.1%)	0	1
Gallbladder_Roughness	34 (23.9%)	26 (24.3%)	8 (22.9%)
Viral_Hepatitis(no)	59 (41.5%)	42 (39.3%)	17 (48.6%)	0.6	0.44
Viral_Hepatitis(yes)	83 (58.5%)	65 (60.7%)	18 (51.4%)
age(years)	59.45 ± 15.95	57.22 ± 15.91	66.26 ± 14.26	1244	0.003
diameter(mm)	13.75 ± 3.43	12.76 ± 3	16.78 ± 2.84	632	<0.001
NLR	3.03 ± 1.82	2.77 ± 1.79	3.82 ± 1.69	1262.5	0.004
BMI	22.1 ± 3.96	22.3 ± 4.02	21.49 ± 3.76	2144	0.2
TBIL（mg/dL）	16.72 ± 8.79	16.46 ± 7.91	17.51 ± 11.14	1924	0.809
ADA（IU/L）	12.58 ± 8.14	12.42 ± 8.3	13.06 ± 7.73	1741	0.535
CEA（ng/mL)	4.21 ± 3.96	4.09 ± 3.98	4.57 ± 3.9	1603.5	0.204
CA199（U/mL）	23.54 ± 19.9	22.8 ± 19.76	25.81 ± 20.47	1678.5	0.36
ALP（IU/L）	106.18 ± 52.89	105.38 ± 54.22	108.6 ± 49.27	1719	0.469
AST（IU/L）	28.88 ± 15.58	29.33 ± 14.86	27.52 ± 17.74	2214.5	0.106
ALT（IU/L）	33.48 ± 21.56	33.08 ± 21.46	34.72 ± 22.13	1791.5	0.703
